# Supplementary material for: Epidemiological Features and Clinical Presentations of Acute Coronary Syndrome in Young Patients
Source: PubMed Central journal article supplement — Intern Med. 2020 Feb 12;59(9):1125–31. doi: 10.2169/internalmedicine.4138-19 (PMC7270760; doi:10.2169/internalmedicine.4138-19), 2020-02-12
Supplement: 1349-7235-59-1125-s002.pdf [file 1349-7235-59-1125-s002.pdf]

**Supplementary table 1. Medical treatments before admission**

|                        | Young ACS<br>(n=37) | Elderly ACS<br>(n=324) | <i>p</i> |
|------------------------|---------------------|------------------------|----------|
| β-blockers             | 4 (10.8)            | 31 (9.6)               | 0.81     |
| ACE-inhibitors         | 1 (2.7)             | 9 (2.8)                | 0.98     |
| ARB                    | 7 (18.9)            | 111 (34.3)             | 0.06     |
| Ca-channel antagonists | 4 (10.8)            | 114 (35.2)             | 0.003    |
| Statin                 | 6 (16.2)            | 98 (30.2)              | 0.07     |
| Pure EPA products      | 1 (2.7)             | 13 (4)                 | 0.70     |
| Anti platelet agents   | 3 (8.1)             | 79 (24.4)              | 0.03     |
| DOAC                   | 0 (0)               | 5 (1.5)                | 0.45     |
| Warfarin               | 0 (0)               | 10 (3.1)               | 0.28     |

Values are n (%). ACE = Angiotensin-converting-enzyme; ARB = Angiotensin II receptor

blockers; EPA = Eicosapentaenoic acid; DOAC = Direct oral anticoagulants.
